# Supplementary material
Source: publisher figshare collection journal article supplement (https://sage.figshare.com/ndownloader/files/20186328)
Supplement: Supplementary file 1 [file 20186328]

Supplemental file

Table S1. Measures to integrate social desirability bias awareness into research activities at the pre-fieldwork stage of research

| Activity                                       | Measures to minimize social desirability bias                                                                                                                                                                                                                                                                                                                                                                                       |
|------------------------------------------------|-------------------------------------------------------------------------------------------------------------------------------------------------------------------------------------------------------------------------------------------------------------------------------------------------------------------------------------------------------------------------------------------------------------------------------------|
| Develop, pilot and revise research instruments | <ul style="list-style-type: none"><li>-When drafting questions, heed techniques for questioning that reduce social desirability responses</li><li>-Get a sense of which topics are culturally sensitive and likely to elicit social desirability tendencies; begin with neutral topics, and transition to more sensitive ones</li></ul>                                                                                             |
| Determine participant recruitment strategy     | <ul style="list-style-type: none"><li>-If possible, avoid recruiting participants through individuals that occupy a high-power position; if this is not possible, consider briefing the recruiter about the purpose of the study beforehand, emphasizing the importance of participants providing genuine answers, even if critical</li><li>-If appropriate, consider avoiding participant/recruiter reimbursement offers</li></ul> |
| Data collector training                        | <ul style="list-style-type: none"><li>-Brief data collectors on the purpose of the research and the confidentiality and anonymity procedures</li><li>-Prepare data collectors for the possibility of social desirability bias: discuss known cues and strategies, and how they may be relevant within the research context</li></ul>                                                                                                |

## Detecting and limiting social desirability bias

|                                |                                                                                                                                                                                                                                                                                                                                                                                                                         |
|--------------------------------|-------------------------------------------------------------------------------------------------------------------------------------------------------------------------------------------------------------------------------------------------------------------------------------------------------------------------------------------------------------------------------------------------------------------------|
|                                | <ul style="list-style-type: none"><li>-If data collectors are responsible for transcription tasks, provide training about verbatim transcription methods</li><li>-Consider establishing a protocol for data collectors to report suspected social desirability tendencies (e.g. through memos on the transcripts, or in individual reflection sessions)</li></ul>                                                       |
| Plan data collection logistics | <ul style="list-style-type: none"><li>-Select a location for data collection that is neutral (e.g. not a government office) and that will provide adequate privacy</li><li>-Consider matching the participants and the data collector by relevant characteristics (e.g. gender, ethnicity, age)</li><li>-Reserve time for regular debriefing sessions and team meetings to discuss social desirability issues</li></ul> |
